# Supplementary material for: Electrospun Polyvinylpyrrolidone-Based Dressings Containing GO/ZnO Nanocomposites: A Novel Frontier in Antibacterial Wound Care
Source: MDPI journal article supplement (doi:10.3390/pharmaceutics16030305), 2024-02-22
Supplement: s1 [file s1]

# Supporting Information

## **Electrospun Polyvinylpyrrolidone-Based Dressings Containing GO/ZnO Nanocomposites: A Novel Frontier in Antibacterial Wound Care**

Cristina Martín <sup>1,\*</sup>, Adalyz Ferreiro Fernández <sup>2</sup>, Julia C. Salazar Romero <sup>1</sup>, Juan P. Fernández-Blázquez <sup>3</sup>, Jabier Mendizabal <sup>4</sup>, Koldo Artola <sup>4</sup>, José L. Jorcano <sup>1,5</sup> and M. Eugenia Rabanal <sup>2,\*</sup>

<sup>1</sup> Department of Bioengineering, Universidad Carlos III de Madrid, 28911 Leganés, Spain; 100356873@alumnos.uc3m.es (J.C.S.R.); jjorcano@ing.uc3m.es (J.L.J.)

<sup>2</sup> Department of Materials Science and Engineering and Chemical Engineering & IAAB, Universidad Carlos III de Madrid, 28911 Leganés, Spain; adferrei@ing.uc3m.es (A.F.F.)

<sup>3</sup> IMDEA Materials Institute, 28906 Getafe, Spain; juanpedro.fernandez@imdea.org (J.P.F.)

<sup>4</sup> Domotek Ingeniería Prototipado y Formación S.L., 20003 San Sebastián, Spain; jabier@domotek.es (J.M.); info@domotek.es (K.A.)

<sup>5</sup> Instituto de Investigación Sanitaria Gregorio Marañón, 28007 Madrid, Spain (J.L.J.)

\* Correspondence: cristima@ing.uc3m.es (C.M.); eugenia@ing.uc3m.es (M.E.R.)

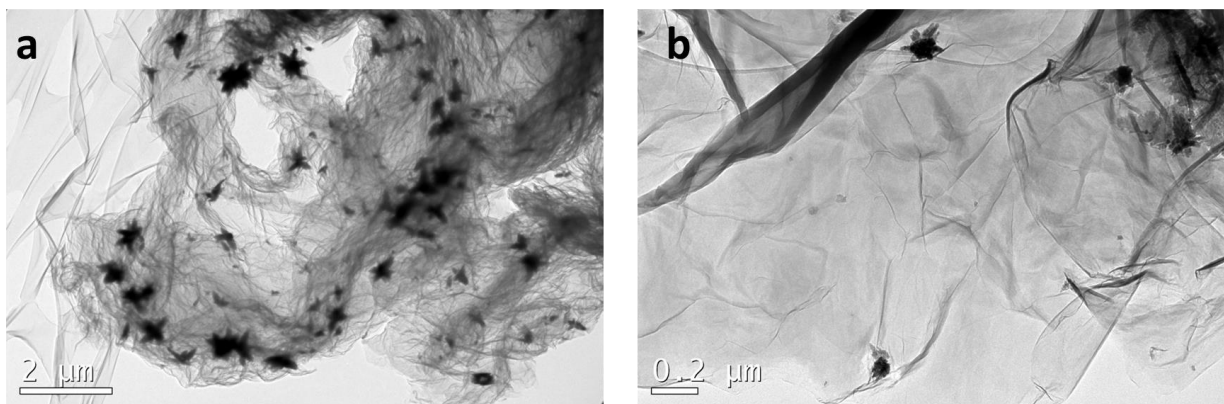

**Figure S1.** Representative TEM images of (a) GO/ZnO\_1:1 and (b) GO/ZnO\_2:1 nanocomposites.

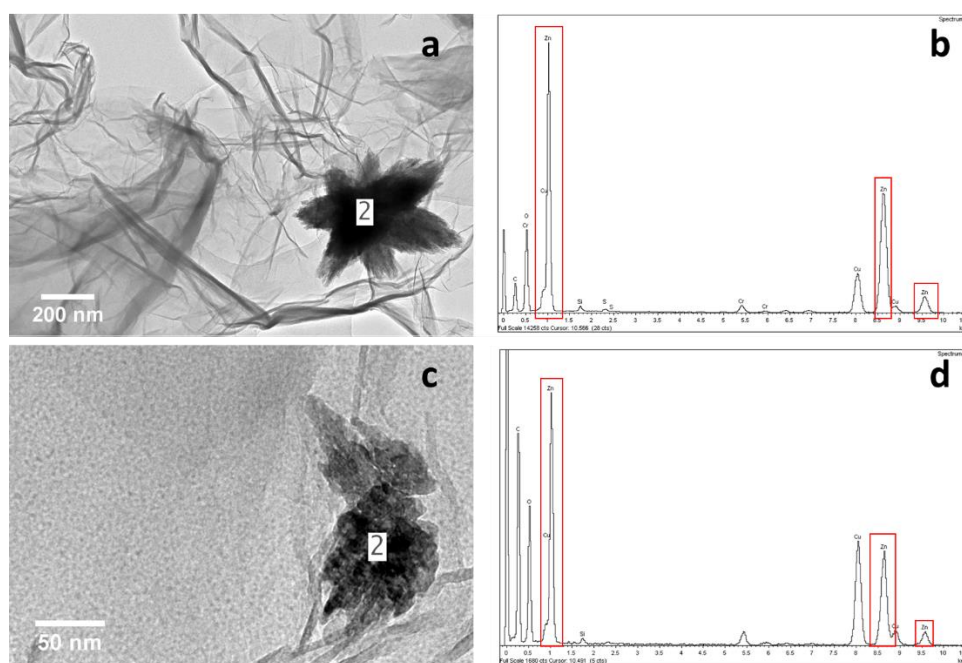

**Figure S2.** EDX analyses of ZnO nanoparticles on the (a,b) GO/ZnO\_1:1 and (c,d) GO/ZnO\_2:1 nanocomposites. Red squares indicate the peaks corresponding to Zn.

# GO/ZnO\_1:1

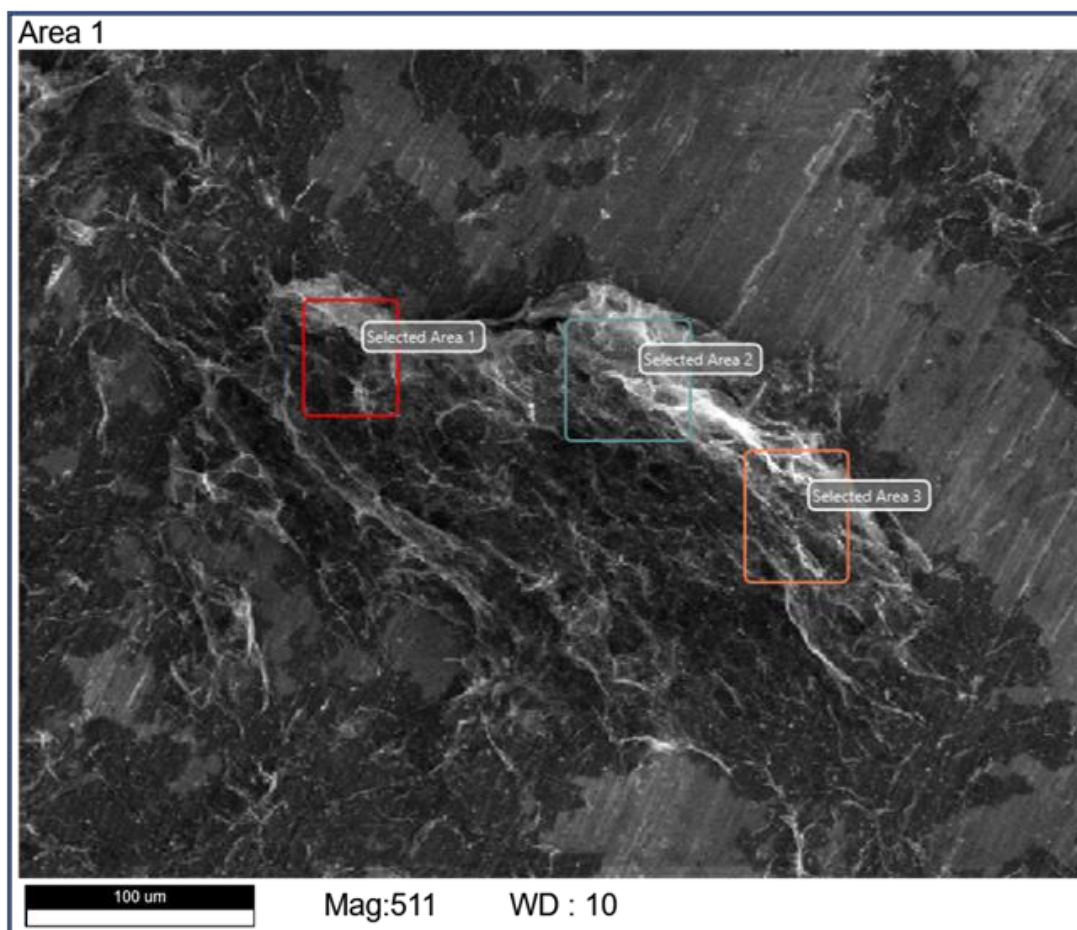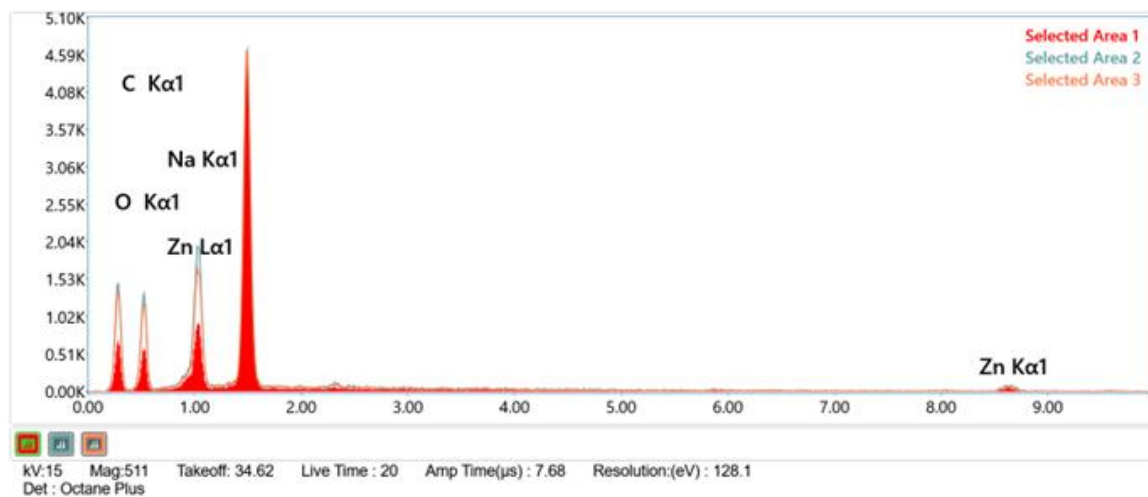

**Figure S3.** SEM pictures and element mapping results of GO/ZnO\_1:1 composite.

# GO/ZnO\_2:1

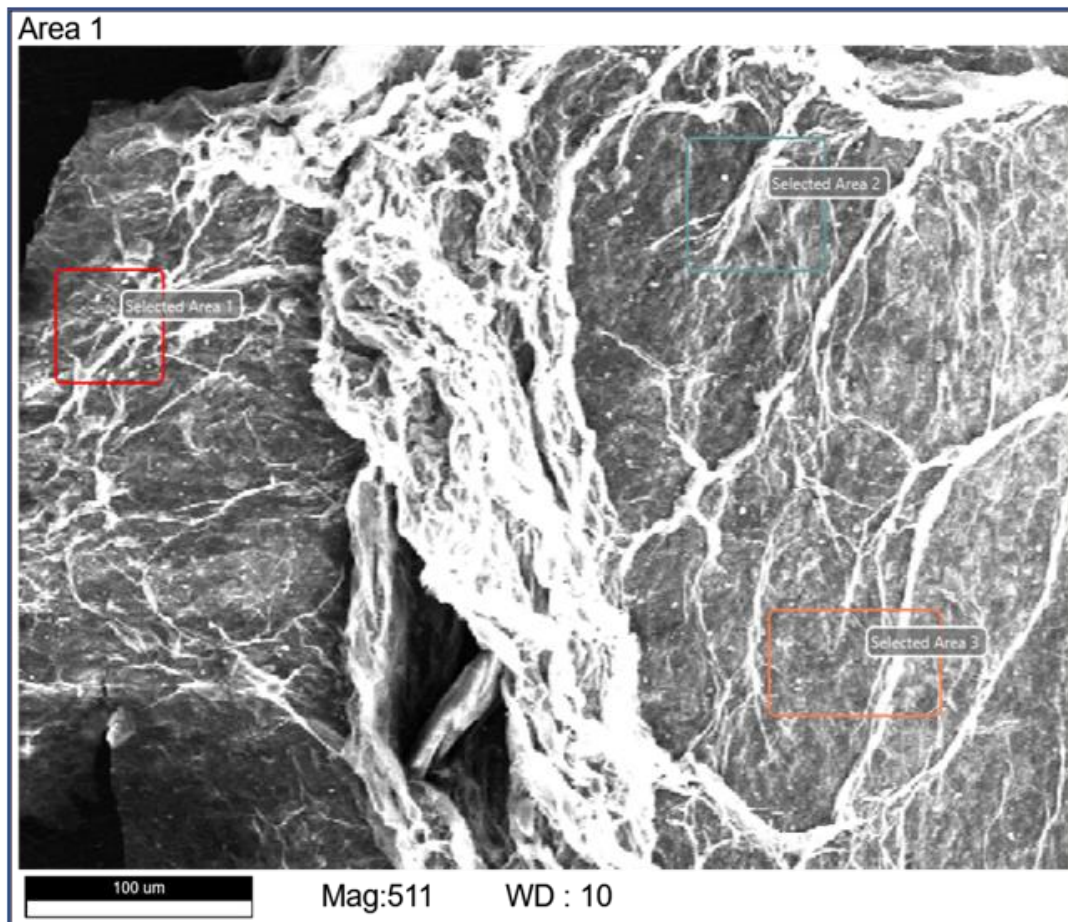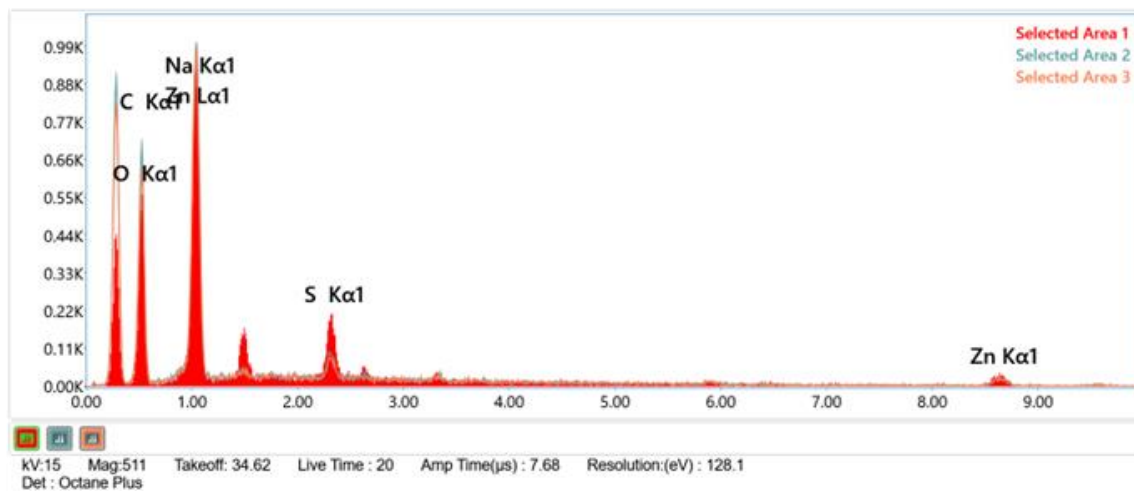

**Figure S4.** SEM pictures and element mapping results of GO/ZnO\_2:1 composite.

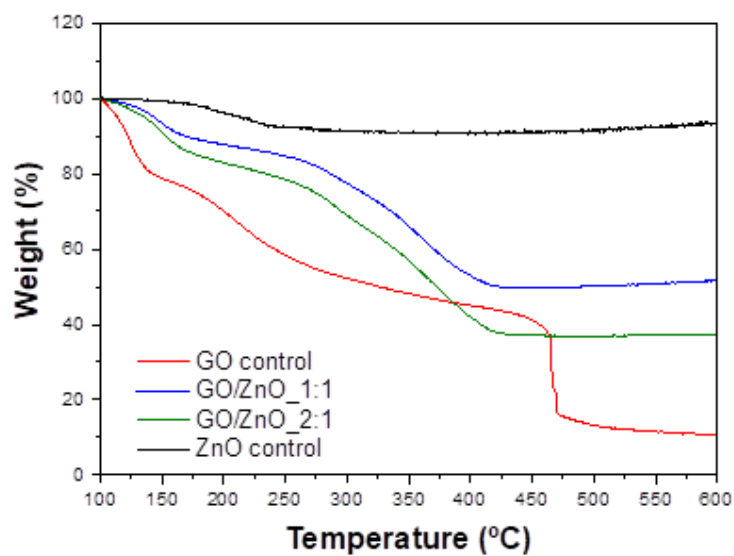

**Figure S5.** TGA analyses for GO, ZnO, GO/ZnO\_1:1 and GO/ZnO\_2:1 samples, performed under air atmosphere.

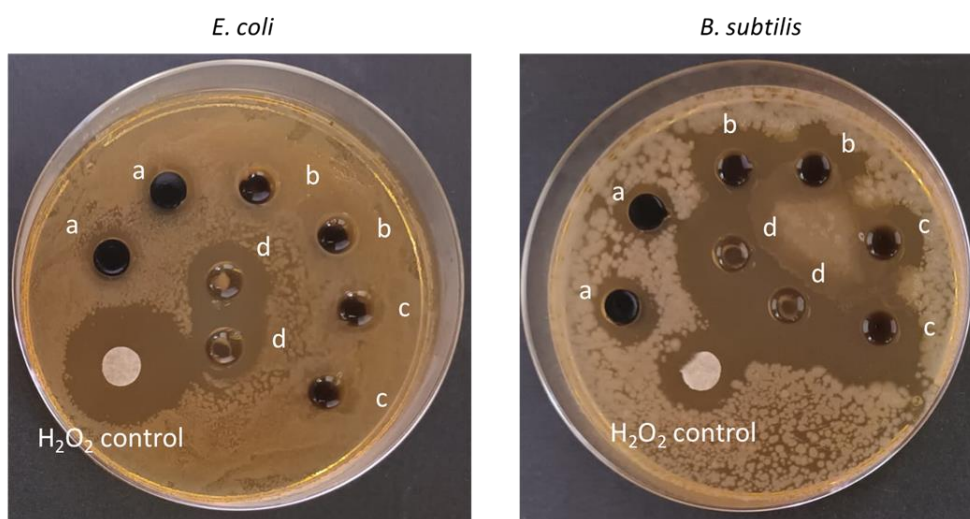

**Figure S6.** Antibacterial activity of GO (“a”, 10.0 mg/mL), GO/ZnO\_1:1 (“b”, 0.1 mg/mL), GO/ZnO\_2:1 (“c”, 0.1 mg/mL) and ZnO (“d”, 1.2 mg/mL) by the well diffusion assay against

Gram-negative (i.e., *E. coli*, left) and Gram-positive (i.e., *B. subtilis*, right) bacteria. Filter paper moistened with H<sub>2</sub>O<sub>2</sub> was used as a positive control.

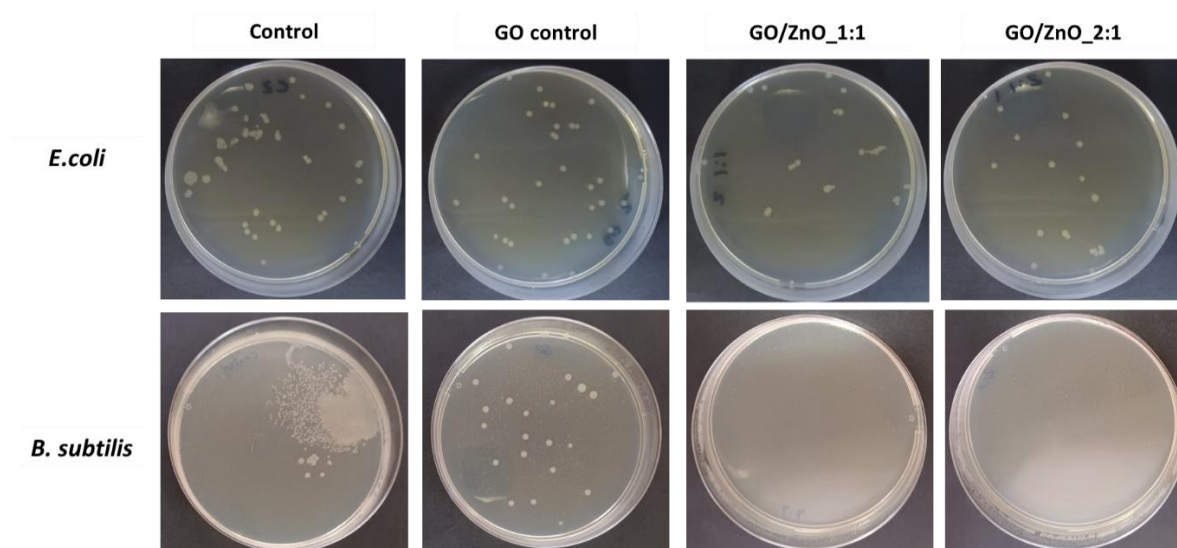

**Figure S7.** Representative digital images of the *E. coli* (upper panel) and *B. subtilis* (lower panel) culture plates after incubation in the presence of the different nanomaterials' dispersions (final concentration of 0.1 mg/mL). The control sample refers to incubation of both strains in the absence of any nanomaterial.

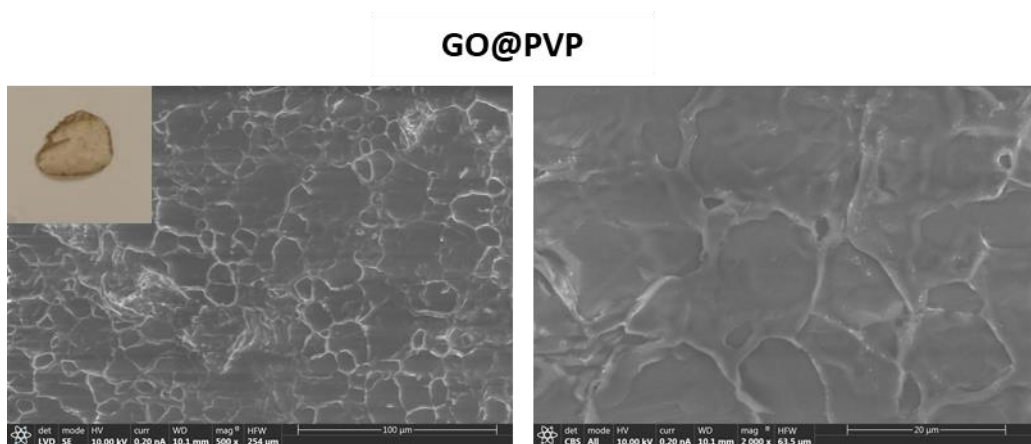

**Figure S8.** Representative SEM images of the GO@PVP control electrospun dressing at different magnifications. Scale bars: (left) 100  $\mu\text{m}$ , (right) 20  $\mu\text{m}$ . The inset image shows a digital photo of the dressing sample cut in round shapes with a diameter of 8 mm.

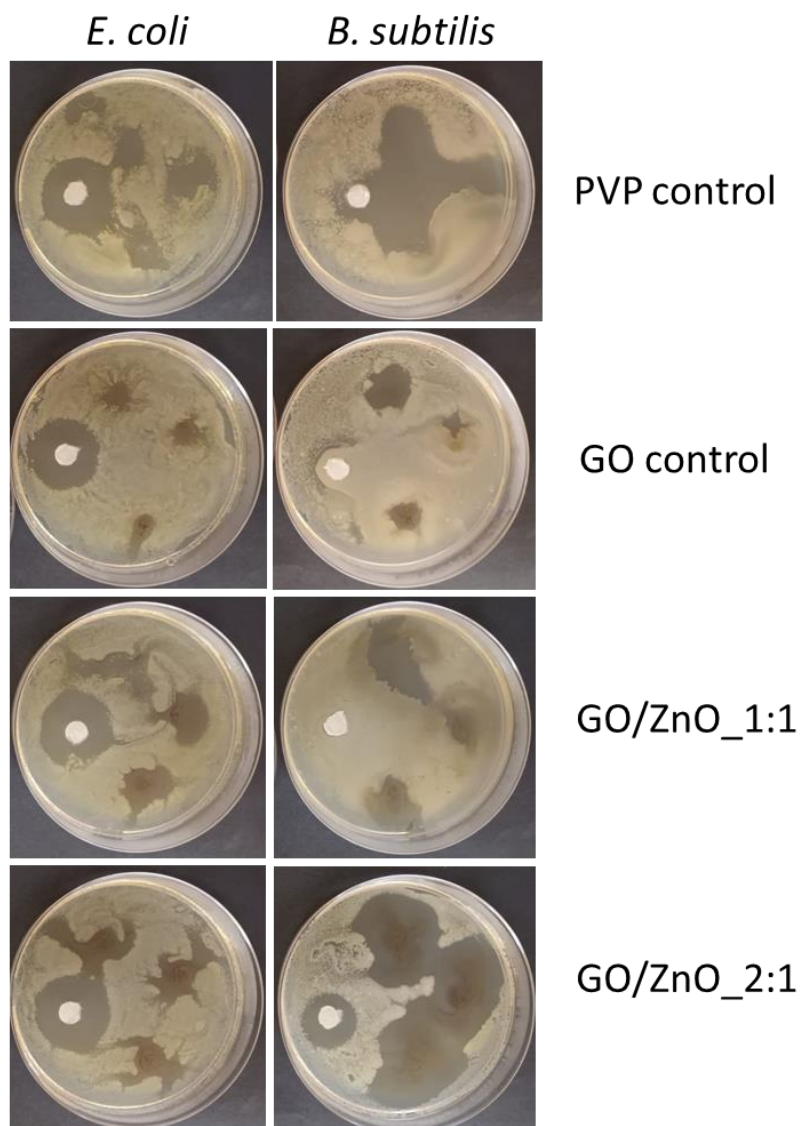

**Figure S9.** Digital images of *E. coli* (left panel) and *B. subtilis* (right panel) agar plates showing the three inhibition zones for each electrospun dressing sample after incubation at 37 °C. A positive control of H<sub>2</sub>O<sub>2</sub> solution (1M) poured onto a round filter paper was added to each plate.
